# Supplementary material for: Androgen-regulation of the protein tyrosine phosphatase PTPRR activates ERK1/2 signalling in prostate cancer cells
Source: PubMed Central journal article supplement (PMC4302442; doi:10.1186/s12885-015-1012-8), 2015-01-16

Additional file 3: Figure S2

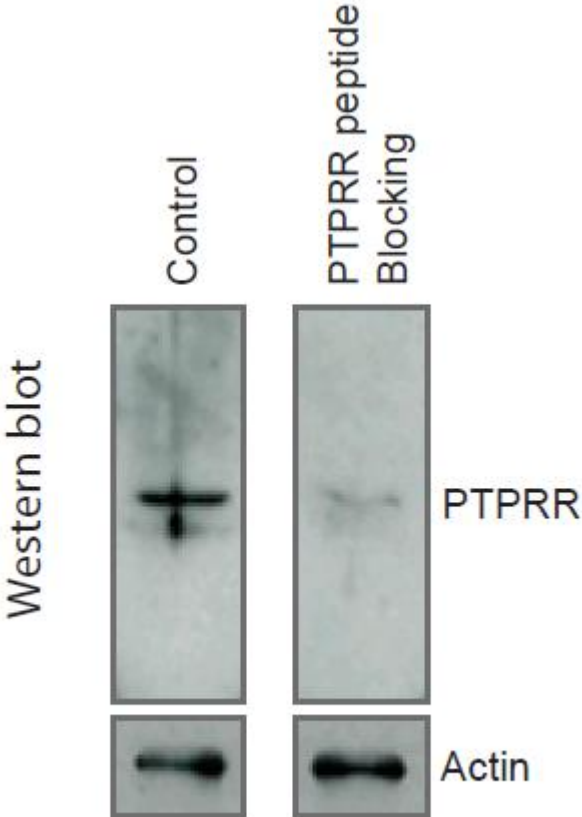

Supplement: 12885_2015_1012_MOESM1_ESM.pdf [file 12885_2015_1012_MOESM1_ESM.pdf]
