# Supplementary material for: Androgen-regulation of the protein tyrosine phosphatase PTPRR activates ERK1/2 signalling in prostate cancer cells
Source: BMC Cancer. 2015 Jan 16;15:9. doi: 10.1186/s12885-015-1012-8 (PMC4302442; doi:10.1186/s12885-015-1012-8)
Supplement: Additional file 4: Figure S1. — AR binding sites in ERK1/2 associated genes. Data for AR ChIP-seq peaks was uploaded from Massie et al. [2] supplementary data onto UCSC genome browser custom tracks. The position of AR ChIP-seq peaks detected in LNCaP cells within 100 kb of the PTPRR gene are illustrated (A). Scale bar is 100 kb. The position of AR ChIP-seq peaks detected within 100 kb of ADCY1, OPKR1, TRIB1, SPRY1, PTGER4 and TSPYL2 are shown below (B). [file 12885_2015_1012_MOESM4_ESM.pdf]

## A

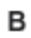

|               | Gene location             | AR ChIP-seq peaks         | Distance to gene (bp)  |
|---------------|---------------------------|---------------------------|------------------------|
| <b>PTPRR</b>  | chr12: 71031853-7131458   | chr12: 70958876-70959445  | 72,408                 |
|               |                           | chr12: 71026249-71026985  | 4,868                  |
|               |                           | chr12: 71237995-71238552  | Within gene (intronic) |
|               |                           |                           |                        |
| <b>ADCY1</b>  | chr7: 45614125-45762714   | chr7: 45697190-45698375   | Within gene (intronic) |
|               |                           |                           |                        |
| <b>OPRK1</b>  | chr8: 54138276-54164257   |                           |                        |
|               |                           |                           |                        |
| <b>TRIB1</b>  | chr8: 126442563-126450647 | chr8: 126426832-126427204 | 15,359                 |
|               |                           | chr8: 126515354-126516254 | 73,691                 |
|               |                           |                           |                        |
| <b>SPRY1</b>  | chr4: 124317950-124324915 | chr4: 124405934-124406471 | 81,556                 |
|               |                           |                           |                        |
| <b>PTGER4</b> | chr5: 40680032- 40693837  | chr5: 40685713-40686082   | Within gene (intronic) |
|               |                           | chr5: 40720992-40721463   | 27,155                 |
|               |                           | chr5: 40721903-40722381   | 28,066                 |
|               |                           |                           |                        |
| <b>TSPYL2</b> | chrX: 53111542-53117728   | chrX: 53117533-53117984   | 195                    |
|               |                           | chrX: 53132418-53132872   | 14,690                 |
